# Supplementary material
Source: publisher figshare collection journal article supplement (https://gsapubs.figshare.com/articles/dataset/_/12542051)
Supplement: Supplementary file 1 [file 1]

## Sheet: Geochemistry
Sample	Unit	SiO[2]	TiO[2]	Al[2]O[3]	Fe[2]O[3]	MnO	MgO	CaO	Na[2]O	K[2]O	P[2]O[5]	SO[3]	LOI	xrf	Zr	Zn	Y	V	Sr	Rb	Pb	Ni	Cu	Cr	icp	Cs	Ce	Nd	Sm	Pr	La	Ba	Dy	Er	Eu	Gd	Hf	Ho	Lu	Nb	Sc	Ta	Tb	Tm	Th	U	Yb	Sample	87Sr/86Sr
BR12-1	Ferrar Sill/Dike	55.01	0.61	15.45	8.52	0.18	6.82	10.9	1.91	0.37	0.08	0.02	3.2222		91.2	80.5	20.8	226.2	128.3	42	3.3	82.3	83.1	167.7		0.435	24.44	10.64	2.45	2.93	10.66	174	2.98	2.09	0.733	2.69	2.08	0.633	0.319	4.94	40.9	0.306	0.467	0.328	3.38	1.27	1.87
BR12-138	Ferrar Sill/Dike	54.27	0.64	15.8	8.89	0.17	6.31	11.08	1.74	0.84	0.09	0.02	2.5027		93.5	82.6	21.3	224.1	113	30.1	5.7	82.9	89.3	132.7		0.203	25.9	11.99	2.55	2.96	10.71	197	3.31	1.96	0.764	3.03	2.06	0.7	0.334	5.17	42.1	0.319	0.475	0.312	3.3	1.88	1.98
BR12-139	Ferrar Sill/Dike	54.02	0.63	15.75	8.81	0.17	6.82	11.14	1.63	0.76	0.08	0.02	3.037		88.7	93.3	20.5	229.6	122.6	26.9	4.2	92	86.2	146.2		0.139	22.4	10.94	2.31	2.66	9.78	172	3.11	1.99	0.714	2.91	2.04	0.611	0.287	4.54	40.4	0.303	0.438	0.278	2.87	1.68	2.1
BR12-141	Ferrar Sill/Dike	53.84	0.63	15.66	9.21	0.17	6.58	11.26	1.58	0.8	0.08	0.02	1.9243		92.4	81.9	20.5	223.2	131.5	22.1	3.6	92.3	89.6	142.5		0.0834	24.8	11.56	2.53	2.88	10.39	206	3.02	2.01	0.789	2.89	2.29	0.653	0.278	4.47	41.4	0.312	0.501	0.274	3.09	1.75	2.14
BR12-146	Ferrar Sill/Dike	54.26	0.63	16.05	8.5	0.16	6.19	11.41	1.71	0.84	0.08	0.01	2.4314		91.6	81.4	21.1	224.7	117.4	31.8	5.1	82.2	84.3	148.2		0.56	24.9	12.13	2.67	2.9	11.51	201	3.32	2	0.774	3.01	2.22	0.651	0.301	5	42.8	0.331	0.481	0.299	3.29	1.85	2.28
BR12-23	Ferrar Sill/Dike	55.77	0.67	15.55	8.69	0.17	5.48	10.39	1.91	1.1	0.09	0.02	1.925		107.1	84.8	23.3	219.1	133.2	41	6.2	69.1	85.3	103.7		0.395	29.5	14.08	3.2	3.56	13.78	244	3.5	2.1	0.778	3.15	2.78	0.757	0.337	5.57	40.6	0.367	0.54	0.339	4.18	1.65	2.44
BR12-35	Ferrar Sill/Dike	54.24	0.62	15.64	8.81	0.2	6.56	11.09	1.81	0.78	0.09	0.02	1.5292		89.4	87	20.1	231.2	120.9	26.3	4.3	81.5	84.1	152.1		0.302	22.25	11.35	2.82	2.79	9.9	177	3.14	2.01	0.683	2.93	2.12	0.653	0.336	4.38	43.3	0.297	0.482	0.301	2.77	1.32	2.06
BR12-50	Ferrar Sill/Dike	53.06	0.5	16.05	8.95	0.15	6.87	11.48	2.03	0.68	0.06	0.01	5.2472		71.5	69.1	16.4	230.3	159.2	28.3	0.8	86.9	87.7	149.6		0.274	16.76	8.83	2.28	2.05	8.36	143	2.8	1.51	0.527	2.38	1.62	0.558	0.254	3.28	42.3	0.236	0.422	0.273	2.11	1.02	1.57
BR12-56	Ferrar Sill/Dike	54.01	0.61	15.72	8.83	0.16	6.74	11.3	1.65	0.74	0.08	0.02	4.1548		88	81.8	21.5	230.8	119.1	25.2	7.1	80.5	84.1	149.8		0.777	22.26	10.93	2.48	2.72	9.91	159	2.78	1.9	0.716	2.5	1.96	0.673	0.254	4.54	42.6	0.286	0.446	0.297	2.72	1.52	2.21
BR12-57	Ferrar Sill/Dike	53.87	0.63	15.8	9.05	0.17	6.73	11.07	1.73	0.72	0.09	0.02	3.6037		90.9	83.8	20.7	234	119.3	26.2	7.1	82.4	85	153.4		0.351	22.7	11.43	2.84	2.71	9.8	175	2.98	1.89	0.693	2.19	1.89	0.619	0.277	4.52	40.9	0.303	0.446	0.303	2.74	1.63	1.84
BR12-73	Ferrar Sill/Dike	54.13	0.62	15.78	8.92	0.16	6.41	11.28	1.69	0.75	0.08	0.02	3.1155		90.3	83.6	21.2	234.5	118.4	29	3.2	77.2	85.1	140.1		0.218	22.02	11.72	2.34	2.84	10.27	174	3.31	1.84	0.715	2.82	2.18	0.65	0.293	4.64	43.7	0.37	0.47	0.295	2.93	1.66	2.06
BR12-74	Ferrar Sill/Dike	55.02	0.65	15.56	8.88	0.17	5.92	10.74	1.81	0.98	0.09	0.02	2.9138		100.8	82.7	21.2	218.5	132.8	37.7	6.6	76.2	85.7	123.8		0.29	26.61	13.28	3.23	3.31	12.78	217	3.29	2	0.714	2.85	2.52	0.735	0.337	5.25	41.4	0.381	0.494	0.3	3.64	2.09	2.39
BR12-84	Ferrar Sill/Dike	53.85	0.55	15.2	8.84	0.17	8.22	10.67	1.57	0.69	0.07	0.01	1.7282		82.1	79.3	17.5	218.2	108.6	19.2	3.4	108.5	76	259.5		0.101	19.5	10.17	2.18	2.28	8.77	162	2.6	1.68	0.601	2.53	1.72	0.541	0.255	3.98	40.9	0.254	0.376	0.265	2.3	1.52	1.66
BR12-147	Ferrar Sill/Dike	54.22	0.65	17.19	8.43	0.16	5.16	11.35	1.79	0.8	0.09	0.02	2.8613		93.4	87.6	21	227	128.1	28.4	5.8	58.1	87.7	43.1		0.221	24.1	11.39	2.85	2.93	10.37	183	3.3	1.93	0.839	3	2.01	0.683	0.311	4.73	40.1	0.353	0.495	0.305	2.98	1.71	2.07	BRIC 147	0.711787
BR12-128	Ferrar Sill/Dike	54.28	0.64	15.94	8.4	0.17	6.21	11.47	2.04	0.59	0.09	0.02	2.7409		91.3	84.8	21.5	241	117.1	17.8	3.1	73.7	85.9	106.2		0.139	23.3	10.93	2.26	2.69	10.25	167	3.32	1.98	0.79	2.57	2.13	0.673	0.275	4.56	41.2	0.327	0.423	0.264	2.85	1.73	2.08	BRIC 128	0.711184
BR12-132	Ferrar Sill/Dike	54.41	0.61	15.63	8.58	0.17	7.03	11.05	1.75	0.54	0.08	0.02	3.795		87.2	79.2	20.2	227.5	117	16.1	4.5	90.8	83.7	179		0.159	22.92	10.79	2.58	2.71	9.64	157	2.78	1.88	0.651	2.61	2.11	0.631	0.272	4.33	42.6	0.319	0.421	0.255	2.7	1.68	2.04	BRIC 132	0.71157
BR12-129	Ferrar Sill/Dike	54.13	0.62	15.44	9.02	0.18	6.99	10.96	1.89	0.53	0.09	0.02	3.4681		89.9	92.7	20	231.6	120.6	12.3	5.7	85.5	85.4	176.8		0.1136	23.1	10.33	2.62	2.68	9.94	150	2.76	2.04	0.669	2.92	1.99	0.656	0.294	4.43	41.2	0.263	0.47	0.285	2.71	1.69	1.69	BRIC 129	0.711391
BR12-103	Massive/Diffusely Layered	69.63	0.37	15.54	2.64	0.04	1.01	2.46	3.47	4.54	0.07	0.02	5.3228		179.8	54.2	36.5	34.5	445.8	183.4	25.6	11.4	20.2	18.3		0.953	71	30.2	6.21	8.15	38.6	732	5.15	3.13	0.786	5.98	5.1	1.039	0.473	15.5	8.4	1.326	0.835	0.405	15.5	11.19	2.77	BRIC 103	0.71901
BR12-100	Massive/Diffusely Layered	69.76	0.45	14.66	3.31	0.06	1.4	2.82	3.43	3.85	0.09	0.02	3.7144		178.7	62.4	34.4	54	288.2	165.4	23	6.4	17.4	24.7		1.135	70.2	31	6.08	8.35	37.5	714	5.66	3.21	0.901	5.69	4.95	1.192	0.443	15.06	12.1	1.086	0.89	0.521	13.36	10.59	2.94
BR12-104	Massive/Diffusely Layered	70.56	0.37	15	2.59	0.04	1.16	2.25	3.33	4.42	0.07	0.02	4.7683		179	50.7	30.5	39	322.3	187.9	21.7	0.6	12.2	14.7		0.982	74.5	27.9	5.49	7.83	35.4	777	4.22	2.76	0.718	4.9	5.57	1.03	0.451	16.14	8.83	1.22	0.801	0.449	15.01	10.6	2.89
BR12-106	Massive/Diffusely Layered	69.13	0.39	15.91	2.48	0.04	1.05	2.43	3.53	4.75	0.08	0.02	4.2468		181.3	70	26.4	32.9	323.5	187.9	20.4	17.1	30.5	20.5		0.69	69.5	27.1	5.3	7.64	35.9	807	4.43	2.43	0.768	4.12	5.91	0.863	0.432	16.3	9.2	1.34	0.698	0.407	16.35	11.28	2.97
BR12-114	Massive/Diffusely Layered	69.55	0.49	14.43	3.87	0.06	1.45	2.57	3.48	3.78	0.1	0.02	5.0501		187.9	56.9	31.4	55.9	331.9	182.2	22.1	5.7	13.9	21.8		2.6	74.2	30.9	6.73	9	38.2	732	5.05	3.21	0.891	5.59	6.05	1.094	0.503	16.21	13.29	1.31	0.833	0.455	15.17	9.23	3.8
BR12-116A	Massive/Diffusely Layered	68.07	0.55	14.61	4.31	0.08	1.92	3.61	2.97	3.58	0.11	0.02	5.2754		182.8	64.7	30.8	75.2	326.4	148.6	19.8	8.5	17.8	26		0.767	66.6	26.2	5.66	7.55	33	675	4.8	2.65	0.992	4.25	5.09	1	0.4	13.41	16.6	1.033	0.775	0.399	12.85	8.13	2.83
BR12-116B	Massive/Diffusely Layered	70.04	0.48	14.51	3.66	0.06	1.6	2.45	3.01	3.89	0.1	0.02	4.6344		189.8	63.5	30.8	55	289.4	162.4	22.2	7.1	18.2	19.6		1.338	75.7	30.7	5.68	8.04	36.8	800	5.33	2.78	0.81	4.7	5.46	1.02	0.401	14.89	12.5	1.219	0.866	0.46	13.99	9.55	2.82
BR12-117	Massive/Diffusely Layered	67.41	0.54	14.65	4.77	0.08	2.04	4.85	2.64	2.7	0.11	0.02	4.6009		177.7	63.5	29.6	83	413.6	115.3	19.7	10.9	22	27.2		15.65	68.8	26.5	5.47	7.55	32.7	663	5.28	2.82	1.016	5.1	4.81	1.004	0.411	13.34	18.12	0.959	0.833	0.455	12.73	8.19	2.86
BR12-125	Massive/Diffusely Layered	67.41	0.53	14.64	4.21	0.08	1.95	3.74	3.04	4.12	0.1	0.02	5.4505		173.1	63.8	30.7	91.5	234.6	154.4	20.1	13.8	25.8	20.1		0.893	66	26.2	4.9	7.24	31.7	638	4.69	2.9	0.78	5.04	4.88	0.938	0.442	13.58	17.76	1.003	0.794	0.416	11.97	7.85	2.9
BR12-127	Massive/Diffusely Layered	67.39	0.55	14.72	4.72	0.09	2.05	5.47	2.8	1.91	0.1	0.02	7.469		172.5	78.7	30.9	97.4	428	143.3	18.3	17.1	28.8	23.7		16.06	62.9	25.2	5.59	7.11	30.4	643	4.51	2.93	0.94	4.9	4.81	0.953	0.393	12.93	18.5	1.015	0.699	0.45	12.04	7.56	2.85
BR12-134	Massive/Diffusely Layered	68.82	0.51	14.4	4.16	0.08	1.62	3.06	3.36	3.7	0.11	0.02	5.4938		187.4	69.7	30.9	67.1	285.6	157.6	22.6	11.2	20.2	25.5		0.768	76.2	30.2	5.66	7.88	35.5	748	4.57	2.95	0.98	5.78	5.6	1.05	0.467	14.73	14.75	1.21	0.764	0.439	13.65	8.73	3.19
BR12-137	Massive/Diffusely Layered	61.58	0.68	14.5	7.18	0.13	3.36	6.71	3.14	2.41	0.11	0.02	3.3775		146.6	79.6	28.6	169.6	209.3	104.1	12.2	34.8	64.7	30.5		1.207	49.8	21.83	4.4	5.31	22.91	474	4.37	2.72	0.93	3.93	3.9	0.906	0.415	10.04	31.5	0.737	0.74	0.361	7.99	4.83	2.57
BR12-145	Massive/Diffusely Layered	67.16	0.62	14.22	5.03	0.08	2.13	4.26	2.82	3.37	0.12	0.02	4.7117		186.9	69.2	31.8	96.8	261.9	136.3	23.8	11.8	30.7	23.3		1.194	66.6	28	5.62	7.48	32.3	623	5.2	3.08	0.854	5.31	5.17	1.015	0.509	13.88	20.74	1.13	0.776	0.455	12.14	7.52	3.32
BR12-25	Massive/Diffusely Layered	69.57	0.54	14.61	3.66	0.06	1.67	2.93	3.1	3.57	0.11	0.02	6.1342		191.5	79.7	34.4	71.9	277.5	145.9	21.4	11	19.1	26.2		0.997	75.7	33.3	6.51	8.71	39.3	679	5.96	3.69	1.02	5.61	5.85	1.146	0.497	14.36	14.94	1.15	0.923	0.523	13.48	5.98	3.43
BR12-28	Massive/Diffusely Layered	67.79	0.55	14.53	4.37	0.08	2.01	3.8	3.25	3.33	0.11	0.02	5.1816		179.2	65.5	31.1	83.8	267	137.6	22.9	14.9	23	31.1		1.694	65.5	25.6	5.5	7.12	30.8	634	4.65	2.78	0.916	5.14	5.43	0.884	0.394	13.22	16.08	1.02	0.77	0.371	11.66	5.99	2.87
BR12-29	Massive/Diffusely Layered	66.94	0.53	14.58	4.35	0.08	2.02	4.83	2.5	2.97	0.1	0.02	5.7558		176.3	63	29.9	81.1	403.8	116.2	18.8	13	20.2	30.1		12.12	63.6	26.6	5.3	6.98	30.8	593	4.41	2.72	0.905	4.95	4.88	0.917	0.386	12.83	15.84	0.968	0.727	0.423	12.23	5.73	2.75
BR12-30	Massive/Diffusely Layered	66.09	0.57	14.61	5.17	0.09	2.46	4.7	3	3	0.11	0.02	4.0564		170.1	68	29.1	98.9	261.1	120.6	16.1	19.7	28.6	40.4		0.591	58.1	24.8	4.96	6.36	28.3	567	4.14	2.53	0.79	4.71	4.56	0.925	0.411	11.83	18.56	0.958	0.694	0.346	10.84	5.09	2.97
BR12-31	Massive/Diffusely Layered	70.68	0.45	15.12	3.21	0.05	1.51	2.73	2.85	3.39	0.1	0.02	n.d.		143.6	6.4	43.4	53.8	224.4	143.8	23	0.1	4.9	22.7		0.653	67.1	27.3	5.65	7.41	32.2	683	4.29	2.61	0.859	6	5.18	0.915	0.399	13.71	12.15	1.09	0.712	0.383	12.7	6.46	2.8
BR12-41	Massive/Diffusely Layered	66.23	0.58	14.74	4.88	0.09	2.45	4.68	3.03	3.03	0.11	0.02	5.8948		171.4	67.1	30.8	101.1	236.5	128.3	16.6	20.2	27	37.7		1.009	56.3	24.9	5.03	6.48	28.5	577	4.53	2.69	0.808	4.31	4.55	0.97	0.383	11.85	19.04	0.963	0.682	0.417	10.58	5.54	2.48
BR12-47	Massive/Diffusely Layered	66.04	0.58	14.86	4.82	0.1	2.55	4.77	3.06	2.92	0.11	0.02	4.2112		164.7	81.6	39.2	109.1	255.5	122.2	16.9	26.1	33.3	39.9		0.85	67.2	29.5	5.91	7.83	35.4	524	5.84	3.49	0.835	5.87	4.62	1.126	0.489	11.94	20.46	0.976	0.893	0.522	10.86	6.04	3.18
BR12-48	Massive/Diffusely Layered	66	0.57	14.77	4.95	0.09	2.48	4.77	3.1	2.97	0.11	0.02	5.0123		165.9	71.1	29.6	105.4	254.1	119	17.1	17.6	26.6	38		0.689	59.8	26.1	5.5	7.07	29.3	568	4.64	2.92	0.949	4.4	4.58	0.983	0.415	12.36	21.5	0.945	0.749	0.448	11.03	6.43	3.15
BR12-51	Massive/Diffusely Layered	66	0.55	15.07	4.65	0.08	2.49	4.64	3.06	2.85	0.11	0.02	n.d.		144.5	48.6	37.4	101.5	232.2	131.9	20.6	12.4	17.9	42.3		1.227	57	23.6	4.43	6.51	28	542	4.07	2.45	0.8	4.47	4.12	0.944	0.398	11.86	19.31	0.889	0.743	0.424	10.39	5.88	3.06
BR12-52	Massive/Diffusely Layered	63.76	0.59	15.23	5.73	0.1	2.7	5.16	3.21	3.22	0.12	0.02	3.5825		171.7	72.6	29.6	107.8	281.7	138.7	13.5	24.8	29.6	46.1		0.591	62.7	26.1	5.18	6.87	29.2	588	4.58	2.91	1.004	5.01	4.97	0.914	0.421	12.86	21	0.933	0.791	0.461	11.53	6.16	2.85
BR12-53	Massive/Diffusely Layered	65.51	0.57	14.51	5.74	0.09	2.48	4.78	3.06	2.95	0.11	0.02	3.8726		170.7	68.7	29.5	99.7	264.6	117.7	17.5	19.5	28.8	38.5		0.663	58.8	25.5	5.52	6.56	29.1	576	4.72	2.55	0.912	4.46	4.23	0.934	0.386	12.17	19.55	0.929	0.733	0.35	10.59	5.98	2.82
BR12-54	Massive/Diffusely Layered	66.98	0.59	14.5	4.94	0.08	2.2	4.14	3.03	3.23	0.11	0.02	5.9069		178.7	67.5	30.6	97.5	260	136.3	16.4	13	21.2	24		1.32	65.7	26.1	5.62	7.05	30.5	610	5.09	3	0.88	4.41	4.78	0.956	0.39	13.3	19.44	1.01	0.694	0.436	11.45	6.73	3.13
BR12-55	Massive/Diffusely Layered	68.93	0.53	14.4	4.12	0.07	1.69	3.26	3.21	3.51	0.11	0.02	5.9348		191	62.2	31.5	68.3	223.1	153.2	20.5	7.7	15.6	27.8		1.833	70.1	29.8	6.34	7.87	36.5	604	5.18	3.06	0.93	5.73	5.84	1.074	0.454	14.26	14.48	1.09	0.894	0.449	13.68	7.67	3.25
BR12-58	Massive/Diffusely Layered	68.66	0.54	15.08	4.09	0.07	1.76	4.19	4.05	1.21	0.11	0.02	6.9511		181	68.2	31.7	68.1	670.3	323.4	21.1	7.7	16.6	27		7.64	73.6	28.2	5.71	8.06	35.6	616	5.04	3.22	0.952	4.79	5.46	1.063	0.5	14.51	13.89	1.125	0.764	0.41	13.37	7.99	3.32
BR12-59	Massive/Diffusely Layered	69.3	0.53	14.62	3.8	0.07	1.66	3.07	3.02	3.66	0.11	0.02	5.8955		192.1	62.1	31.4	60.9	275.2	137	21.2	8.4	15.7	26.5		0.615	71.3	29.7	5.47	7.9	35.5	703	4.42	3.06	0.991	5.08	5.53	0.973	0.503	14.79	13.6	1.174	0.816	0.455	13.24	8.12	3.02
BR12-61	Massive/Diffusely Layered	71.22	0.33	14.23	2.48	0.04	0.92	1.99	3.32	4.17	0.07	0.01	4.5491		164.7	49.3	32.8	22.7	280.9	175.1	23.7	7.9	8.2	21.8		1.426	64.7	28.5	5.9	7.89	36.7	753	5.32	3.18	0.698	5.76	5.07	1.099	0.471	14.61	7.88	1.195	0.886	0.494	14.26	8.59	3.23
BR12-62	Massive/Diffusely Layered	71.73	0.34	14.57	2.56	0.03	1.01	2.11	3.12	4.25	0.07	0.01	5.363		172.2	42.9	29.6	29.7	288.5	179.2	21.7	6.3	18.9	16.3		1.294	68.5	27.5	5.01	7.71	35.9	752	4.84	2.91	0.705	5.29	5.65	0.904	0.449	14.83	8.63	1.07	0.751	0.472	15.4	9.15	3.04
BR12-67	Massive/Diffusely Layered	62.38	0.61	15.24	6.23	0.11	3.43	7.07	2.27	2.36	0.11	0.02	4.7327		156.1	78.2	28.3	133.3	298.9	77	13.2	31.5	40.7	64.2		4.28	52.2	22.5	5.07	6.12	24.9	479	3.9	2.68	0.97	4.45	4.06	0.915	0.448	10.28	25	0.863	0.71	0.416	9.27	5.44	2.64
BR12-68	Massive/Diffusely Layered	63.33	0.62	15.05	6.02	0.11	3.15	6.94	2.78	1.7	0.11	0.02	5.2451		153.5	99.4	29.7	133.4	347	131.7	9.8	37.7	44.7	55.2		17.66	55.7	23.3	4.83	6.51	26.4	543	4.47	2.64	0.884	4.25	4.23	0.854	0.42	10.97	25.5	0.863	0.73	0.384	9.83	5.7	2.54
BR12-69	Massive/Diffusely Layered	61.83	0.62	15.03	6.75	0.12	3.75	7.56	2.73	1.31	0.11	0.02	5.0008		144.9	75	26.9	148.5	331.4	105.9	12.7	37.9	48.6	69.3		8.75	48.6	21.5	4.16	5.64	23.7	483	4.47	2.65	0.945	4.2	4.21	0.882	0.368	9.82	28.1	0.762	0.728	0.389	8.21	5.05	2.32
BR12-71	Massive/Diffusely Layered	61.36	0.62	15.02	6.81	0.12	3.81	6.96	2.83	2.19	0.1	0.02	3.4607		142.5	74.6	26.7	151.7	220.6	91.8	12.4	39.7	53.8	70.7		0.784	46.2	19.9	4.07	5.24	23.1	442	3.65	2.58	0.811	3.64	4.02	0.789	0.36	8.86	28.4	0.702	0.637	0.349	7.56	4.37	2.25
BR12-72	Massive/Diffusely Layered	61.52	0.65	14.77	7.29	0.12	3.66	7.89	2.55	1.22	0.11	0.02	3.8543		148.2	77.7	26.9	161.6	334.9	84.7	12.3	40.9	60.5	58.6		8.7	48.5	20.4	4.14	5.5	23.53	444	4.11	2.49	0.861	3.52	3.86	0.873	0.365	9.28	30.1	0.703	0.674	0.368	8	4.57	2.6
BR12-75	Massive/Diffusely Layered	56.48	0.68	15.01	8.65	0.17	5.91	9.73	1.9	1.2	0.1	0.02	3.3739		111.1	87.4	24.6	221	140.2	45	6.4	70.2	84.1	126.2		0.262	31.3	14.92	3.21	3.69	14.47	259	3.57	2.46	0.75	3.38	2.57	0.684	0.331	6.14	38.8	0.38	0.539	0.313	4.4	2.63	1.92
BR12-77	Massive/Diffusely Layered	68.57	0.49	14.73	4.02	0.07	1.79	4.25	2.98	2.79	0.1	0.02	5.5869		175.5	64	29.8	70.9	428.1	172.8	20.1	12.1	22.2	34.4		34	68.3	28.1	4.85	7.23	33.8	700	4.5	2.67	0.923	5.01	5.19	0.955	0.441	13.77	14.11	1.017	0.732	0.422	12.75	8.23	2.75
BR12-86	Massive/Diffusely Layered	68.2	0.52	14.57	4.65	0.08	1.9	4.22	3.44	2.12	0.09	0.02	5.1549		176.2	70	31.5	83.5	355.1	163.2	23.4	11.4	26	21		4.96	65	26.2	6.07	7.18	31.9	590	4.83	2.72	0.808	5.24	4.71	0.89	0.465	13.77	16.87	0.902	0.747	0.423	12.69	8.16	2.89
BR12-89	Massive/Diffusely Layered	63.94	0.64	14.44	6.22	0.11	2.78	5.82	2.77	2.98	0.11	0.02	3.0781		166	77.3	29.3	131.6	250.8	123.1	15	17.6	41.8	35.8		0.574	58.3	24.1	5	6.31	27.8	524	4.53	2.82	0.893	4.78	4.42	1.028	0.453	11.46	25.8	0.803	0.78	0.39	9.98	5.84	2.56
BR12-90	Massive/Diffusely Layered	64.53	0.65	14.49	5.85	0.11	2.73	5.71	2.89	2.73	0.11	0.02	4.3999		164.7	75.8	29.9	138.6	241.2	115.5	15.9	16.2	42.1	35.2		1.226	57.5	24.1	4.82	6.36	27.9	525	4.47	2.63	0.891	4.48	4.36	0.968	0.39	11.34	25.2	0.839	0.743	0.41	9.97	6.24	3.23
BR12-91	Massive/Diffusely Layered	66.99	0.58	14.65	4.88	0.08	2.15	4.21	2.94	3.22	0.11	0.02	4.567		178.1	69.5	32.1	97.4	265.2	136.7	20.7	10.9	22.8	24.6		1.18	64.6	26.7	5.38	7.17	31	646	4.32	2.85	0.907	4.96	4.78	0.963	0.417	13.02	18.76	1.008	0.73	0.415	11.47	7.89	2.93
BR12-93	Massive/Diffusely Layered	68.95	0.49	14.57	4.08	0.07	1.57	3.28	3.1	3.6	0.1	0.02	4.6965		184.6	60	30.1	61.4	299.3	158.9	21.7	7	20.8	21		1.471	69.8	29	5.81	7.93	35.1	686	5.04	2.63	0.904	4.95	5.47	0.991	0.507	14.62	14.84	1.18	0.77	0.41	13.06	8.9	2.71
BR12-94	Massive/Diffusely Layered	68.13	0.53	14.59	4.22	0.08	1.92	4.27	2.62	3.39	0.1	0.02	5.8386		173.7	63.3	31.2	83.4	278.6	119.9	20.4	12.9	27.1	17.9		0.586	65.1	27.2	5.6	7.36	32	628	4.72	2.84	0.938	5.36	4.69	1.029	0.41	13.23	18.3	1.033	0.698	0.396	12.17	7.95	3.07
BR12-98	Massive/Diffusely Layered	65.84	0.59	14.72	5.14	0.09	2.55	5.08	2.72	2.95	0.11	0.02	5.0947		171.5	69.1	30.8	107.6	295	134.4	20.9	18.1	31.2	40.9		1.89	63.7	26.6	4.85	6.74	29.7	565	4.75	2.82	0.918	4.61	4.46	0.919	0.461	12.88	20.67	0.918	0.757	0.375	11.19	6.69	2.43
BR12-99	Massive/Diffusely Layered	68.7	0.51	14.64	3.77	0.07	1.79	3.36	3.25	3.61	0.1	0.02	4.4216		181.5	60.6	30	74.3	275.7	153.5	21.3	7.4	23.3	24.8		0.838	64.8	27.2	5.95	7.4	33.7	642	5.14	2.73	0.858	4.92	4.87	0.965	0.462	13.85	14.47	1.032	0.79	0.468	12.91	9.11	3.26
BR12-109	Massive/Diffusely Layered	68.95	0.39	16.14	2.71	0.03	1.42	1.75	3.54	4.8	0.08	0.02	7.9945		186.3	60.4	36.3	39.1	234	202.6	26.6	5.2	15.8	18.5		0.607	73.6	30.5	6.24	8.47	37.5	759	5.41	3	0.894	5.47	5.51	1.137	0.463	16.26	8.83	1.34	0.892	0.424	15.4	10.87	3.03	BRIC 109	0.722046
BR12-26	Massive/Diffusely Layered	66.59	0.58	15.48	4.58	0.07	1.8	3.09	3.3	4.21	0.12	0.02	6.2317		203	70.7	40.8	77.5	255.3	178	23.1	10.9	16	26.3		0.983	71.7	29.6	6.07	7.99	35.8	747	4.97	3.49	0.969	5.61	5.53	1.118	0.456	15.17	14.56	1.3	0.858	0.438	13.6	6.12	2.92	BRIC 26	0.72051
BR12-27	Massive/Diffusely Layered	69.19	0.52	14.4	3.74	0.07	1.6	3.39	3.26	3.57	0.11	0.02	5.4446		188.1	59.7	31.7	68.4	233.4	151.4	21	8.9	14.2	24.6		1.179	65.7	25.9	4.68	7.21	32.4	530	4.37	3.09	0.861	5.14	4.99	0.886	0.416	14.04	13.11	1.051	0.72	0.414	13.13	6.22	3.11	BRIC 27	0.720358
BR12-32	Massive/Diffusely Layered	65.17	0.58	14.94	5.21	0.09	2.69	4.47	3.27	3.27	0.11	0.02	3.7227		173.4	69.7	29.3	101.5	258.5	138.4	16.9	17.9	34.2	40.6		0.555	59.8	25.6	5.77	6.93	29.9	612	4.81	2.79	0.846	4.61	4.69	0.924	0.422	12.77	20.03	1.01	0.744	0.437	11.13	5.38	2.79	BRIC 32	0.718347
BR12-96	Massive/Diffusely Layered	55.66	0.69	15.4	8.68	0.17	5.91	10.16	1.98	1.08	0.1	0.02	3.8172		106.3	84.6	24.1	225.7	135.7	40.8	6.5	73.7	88	118		0.31	30.1	13.21	2.86	3.51	13.47	242	3.42	2.07	0.769	3.27	2.52	0.759	0.348	5.63	39.1	0.395	0.532	0.349	3.95	2.4	2.18	BRIC 96	0.713618
BR12-65	Massive/Diffusely Layered	56.66	0.69	15.31	8.5	0.16	5.3	9.8	1.98	1.32	0.1	0.02	3.2946		114.5	82.2	24.8	211	155.5	48.9	4.2	64.4	85	95.8		0.308	33.7	16.15	3.87	4.08	15.26	285	4.01	2.41	0.809	3.53	3.18	0.826	0.361	6.56	39.7	0.452	0.553	0.356	5.08	2.74	2.47	BRIC 65	0.71414
BR12-24	Massive/Diffusely Layered	63.73	0.64	14.49	6.19	0.1	3.08	6.01	2.92	2.64	0.12	0.02	n.d.		167.3	82	30.1	139.3	229.6	104.4	16	29.1	47.7	42.9		1.068	53.5	23.9	4.85	6.06	26.3	530	4.75	2.8	0.865	4.13	4.43	0.931	0.449	10.4	27.1	0.769	0.675	0.409	9.54	4.3	3.18	BRIC 24	0.717158
BR12-95	Massive/Diffusely Layered	67.38	0.52	14.62	4.86	0.07	1.99	3.77	2.95	3.54	0.1	0.02	4.7211		175.2	65.5	29.8	86.8	250.6	149.6	20.9	9.6	27.4	22.3		0.945	61.7	26.4	5.06	6.79	30.2	615	4.78	2.85	0.869	4.69	4.86	0.936	0.414	12.93	16.87	0.952	0.668	0.434	11.75	8.13	2.87	BRIC 95	0.720288
BR12-49	Massive/Diffusely Layered	66.22	0.58	14.79	5.08	0.09	2.56	4.63	2.85	2.9	0.11	0.02	2.7208		172	69.9	28.8	105.6	238.6	118.5	17.1	18.3	26.5	40		0.996	63.3	25.6	4.93	6.92	28.9	548	4.74	2.83	0.987	4.47	4.8	1.063	0.417	12.37	20.08	0.976	0.737	0.433	10.42	6.13	3.22	BRIC 49	0.718178
BR12-70	Massive/Diffusely Layered	62.22	0.65	14.85	6.64	0.12	3.61	7.38	2.72	1.51	0.11	0.02	4.172		149	83.5	28.7	156.1	310.5	114.3	12.6	34.7	53.7	54.8		8.03	51.3	21.8	4.66	5.68	24.8	509	4.32	2.63	0.849	4.15	4	0.967	0.392	9.7	28.9	0.763	0.653	0.366	8.57	5.03	2.75	BRIC 70	0.715472
BR12-76	Massive/Diffusely Layered	59.9	0.66	14.86	7.46	0.14	4.72	7.38	2.68	1.91	0.1	0.02	4.3506		132.5	80.2	25.5	182.3	199.4	79.1	7.6	51.8	68.5	84.8		0.647	43.2	18.45	4.16	4.89	20.14	408	3.69	2.52	0.857	3.81	3.47	0.909	0.381	8.3	33.4	0.596	0.612	0.373	6.76	4.25	2.54	BRIC 76	0.716188
BR12-130	Massive/Diffusely Layered	70.53	0.44	14.44	3.06	0.06	1.31	2.69	3.16	4.02	0.09	0.02	5.4857		182.6	55.9	30.6	52.9	278	162	21.2	4.9	12.3	17.4		0.792	73.5	27.5	5.76	7.5	34.1	715	4.57	2.83	0.791	4.56	5.46	0.998	0.428	14.37	11.78	1.126	0.74	0.404	13.84	8.63	3.14	BRIC 130	0.720392
BR12-113	Massive/Diffusely Layered	69.86	0.48	14.34	3.76	0.06	1.41	2.64	3.3	3.84	0.1	0.02	3.8642		192.1	57.4	30.3	55.3	291.7	167.8	23.5	3.8	14.1	21.1		1.697	75	30.6	5.32	8.19	35.7	728	5.41	2.94	0.948	5.24	5.28	1.002	0.461	15.28	12.61	1.2	0.786	0.468	14.24	9.54	3.12	BRIC 113	0.720329
BR12-80	Massive/Diffusely Layered	62.05	0.62	14.96	6.28	0.12	3.82	6.56	2.95	2.35	0.1	0.02	4.958		141.8	76.1	26.5	155.5	273.4	105.4	9.2	37.7	49.4	64.8		0.974	49.6	21	4.22	5.52	22.7	493	4.25	2.49	0.871	3.76	3.73	0.925	0.389	9.57	29	0.667	0.698	0.406	8.05	5.34	2.74	BRIC 80	0.716714
BR12-135	Massive/Diffusely Layered	64.75	0.63	14.83	5.55	0.1	2.64	5.66	2.83	2.71	0.11	0.02	4.7464		164.1	72.3	30.8	123.7	269	107.4	17.1	19.4	34.4	34.2		0.701	60.9	24.6	4.5	6.64	28.6	542	4.83	2.74	0.916	5.05	4.6	0.929	0.408	11.77	24.01	0.889	0.674	0.405	10.33	6.44	2.95	BRIC 135	0.717206
BR12-60	Massive/Diffusely Layered	58.43	0.69	14.82	8.3	0.15	4.96	8.23	2.55	1.6	0.11	0.02	5.8951		126.3	84	28.7	201.9	226.2	64.9	10.5	58.4	84.5	98.4		0.606	37.8	18.46	4.05	4.82	19.44	334	4.52	2.66	0.837	3.37	3.28	0.872	0.402	7.28	36.3	0.5	0.648	0.391	5.76	3.5	2.44	BRIC 60	0.715142
BR12-92	Massive/Diffusely Layered	67.43	0.54	14.77	4.49	0.08	1.87	4.92	2.44	2.71	0.11	0.02	5.5648		181.3	71.6	30.2	84.4	578.5	117	18.9	7	19.9	27		32.3	67.2	29.1	5.58	7.47	33.1	634	4.83	2.81	0.92	4.78	4.92	0.948	0.429	13.36	15.38	1.025	0.728	0.432	12.24	7.83	2.9	BRIC 92	0.717046
BR12-87	Massive/Diffusely Layered	68.77	0.5	14.8	3.78	0.09	1.73	4.32	2.75	2.95	0.1	0.02	6.2473		184.7	63.5	30.6	68	689.4	84.2	20.3	6.8	17.4	21.3		5.57	70.9	28.4	5.79	7.64	34.8	701	4.89	2.71	0.832	4.58	4.86	0.957	0.416	14.03	14.04	1.065	0.735	0.423	12.76	8.58	3.01	BRIC 87	0.717106
BR12-101	Vitrophyre Layer	71.89	0.35	14.66	2.61	0.04	0.85	2.38	4.33	2.63	0.07	0.01	5.5782		163.6	46.4	29	31.5	339.4	331.8	24.3	4.7	11.8	15.6		13.5	79.3	31.1	5.53	8.51	38.4	865	5.52	3.24	0.75	5.05	5.73	1.05	0.509	17.3	8.99	1.3	0.889	0.496	16.4	11.68	2.92
BR12-11	Vitrophyre Layer	71.96	0.37	14.53	2.87	0.05	0.93	2.44	4.27	2.28	0.08	0.01	3.2193		176.9	48.8	29.1	32.4	330.4	227.2	23.2	2.6	12.9	17.8		2.9	71.1	29.1	5.99	7.87	36.4	771	4.55	2.79	0.837	4.91	5.64	1.03	0.403	15.92	9.5	1.3	0.854	0.431	15.53	7.77	3.33
BR12-14	Vitrophyre Layer	71.82	0.37	14.64	2.8	0.04	0.9	2.46	4.24	2.45	0.08	0.01	5.3283		174.8	49.7	29.1	35.7	332.1	210.3	20.5	10.5	6.3	17.2		2.76	73.7	28.9	6.1	7.9	36	775	4.59	3.04	0.83	5.76	5.72	1.01	0.478	16	9.32	1.2	0.86	0.449	15.9	7.26	2.74
BR12-15	Vitrophyre Layer	71.84	0.39	14.68	2.77	0.04	0.95	2.99	4.05	1.98	0.08	0.02	5.2011		171.5	52.6	27.8	42.8	427.7	286.1	22.2	1.6	9.6	13.5		35	68.4	29.6	4.9	7.61	38.5	803	5.05	2.84	0.759	4.68	6.33	0.989	0.492	15.11	9.69	1.34	0.814	0.45	14.47	7.2	3.68
BR12-19	Vitrophyre Layer	71.79	0.36	14.55	2.75	0.05	0.95	2.56	4.01	2.69	0.07	0.01	4.7524		169.8	49	30.2	32.9	333.8	250.9	21.3	6.9	9.9	17.7		3.63	75	28.6	5.43	8.09	37.7	814	5.56	3.29	0.98	5.19	5.95	1.09	0.493	16.3	10.14	1.35	0.738	0.452	15.86	7.76	3.31
BR12-22	Vitrophyre Layer	71.93	0.36	14.61	2.6	0.04	0.91	2.38	4.52	2.37	0.08	0.02	5.592		175.3	52.6	29.1	34.6	326	192.7	21.7	6.8	8.1	16.2		1.97	69.7	28.6	4.94	7.61	34.1	745	3.86	2.9	0.87	5.82	5.61	0.94	0.45	15.6	8.86	1.18	0.707	0.463	15.01	8	2.62
BR12-3	Vitrophyre Layer	71.48	0.38	14.65	2.7	0.04	0.95	3.33	3.14	3.03	0.08	0.02	6.9156		173.6	49.9	29	41.2	493.4	224	22.8	4.6	9.8	17.5		29	71.9	27	4.9	7.36	33.7	802	4.38	2.77	0.886	3.97	5.42	0.913	0.456	14.15	9.13	1.06	0.755	0.358	14.03	6.14	3
BR12-36	Vitrophyre Layer	71.91	0.37	14.55	2.69	0.04	0.9	2.43	4.2	2.63	0.07	0.01	4.6245		172.5	46.5	29.1	33.4	336.7	234.4	24	6.6	6.2	16.2		3.6	69.5	26.1	5.32	7.26	35.9	732	4.04	2.51	0.666	5.01	5.48	0.96	0.481	15.19	8.75	1.032	0.737	0.461	14.4	8.18	2.58
BR12-39	Vitrophyre Layer	71.63	0.37	14.62	2.69	0.04	0.91	2.53	3.98	2.95	0.07	0.01	4.4992		171.7	47.1	28.7	34.5	351.7	242.7	22.3	1.8	9.5	16.1		5.55	72.8	25.7	5.19	7.83	34.5	777	5.15	3.34	0.704	4.51	5.82	0.95	0.493	15.11	9.81	1.29	0.695	0.463	15.4	7.79	3.19
BR12-40	Vitrophyre Layer	71.64	0.37	14.61	2.77	0.04	0.88	2.43	4.34	2.63	0.08	0.01	3.8833		169.9	54.1	29.1	31	332.6	260.8	21.2	10.4	9.4	20.8		4.45	68.9	27.3	5.77	7.51	34.6	780	4.67	2.63	0.68	4.45	5.74	0.828	0.369	14.74	8.86	1.16	0.829	0.41	15.6	7.89	2.63
BR12-42	Vitrophyre Layer	71.79	0.37	14.61	2.67	0.05	0.9	2.46	4.24	2.62	0.07	0.01	4.8263		172.6	47.2	29.8	37.2	338	244.9	22.3	7.2	7.4	12.8		3.71	69.2	29	6.07	7.65	34.6	742	5.3	3.13	0.67	4.59	5.86	1.04	0.473	14.9	9.28	1.15	0.694	0.416	15	8.24	2.46
BR12-43	Vitrophyre Layer	71.79	0.36	14.58	2.69	0.04	0.89	2.49	4.21	2.67	0.07	0.01	3.6985		173.5	50	29	35	342.4	218.2	23.2	4.5	12.8	17.9		3.39	64.3	27.1	4.94	7.04	32.4	713	4.07	2.69	0.736	4.71	5.16	0.83	0.367	14.67	8.24	1.22	0.705	0.344	13.77	8.14	3.03
BR12-44	Vitrophyre Layer	71.56	0.38	14.64	2.78	0.05	0.92	2.49	4.1	2.78	0.08	0.02	4.7126		162.3	48.1	28.9	35	333.1	287.1	16	24.4	10.2	13.3		4.6	65	24.1	5.07	7.18	33.4	728	4.19	2.93	0.784	4.64	5.09	0.89	0.379	14.17	8.31	1.17	0.707	0.402	13.43	7.73	2.71
BR12-45	Vitrophyre Layer	71.81	0.37	14.53	2.8	0.05	0.9	2.43	4.17	2.67	0.08	0.01	5.904		171.2	59.1	30.4	36.8	336.9	289.3	19.8	7.7	11.7	18.1		5.17	66.7	28.5	4.77	7.75	35.1	747	4.45	2.58	0.694	4.94	5.57	0.99	0.437	14.9	8.96	1.18	0.746	0.376	14.6	7.83	2.88
BR12-63B	Vitrophyre Layer	71.79	0.36	14.65	2.74	0.04	0.9	2.42	4.18	2.64	0.07	0.01	4.6484		178	51.2	28.8	34.3	340.5	190.3	24.3	2.1	9.8	14.1		2.23	68.1	27.5	5.61	7.97	37.1	764	4.64	3.34	0.73	5.47	5.64	0.989	0.45	15.16	8.83	1.27	0.708	0.366	14.85	9.11	2.51
BR12-9	Vitrophyre Layer	71.69	0.37	14.68	2.73	0.04	0.88	2.58	3.92	2.81	0.08	0.01	4.6372		169.5	51.1	29.9	38.9	362.8	311.6	23	6.1	8.5	15.2		10.96	70.4	26.3	5.73	7.9	33.7	778	4.77	2.99	0.89	4.2	5.08	0.94	0.486	15.1	8.9	1.15	0.77	0.463	14.2	6.82	2.5
BR12-46	Vitrophyre Layer	71.74	0.36	14.6	2.78	0.05	0.89	2.45	4.04	2.79	0.08	0.01	3.3399		166.8	53.9	28.3	31.2	346.3	346	22.6	4.7	9.2	19.6		9.02	71.4	27.6	5.17	7.68	36.2	758	4.29	3.41	0.84	4.41	5.6	0.92	0.463	14.94	9.7	1.14	0.791	0.432	15.8	8.79	2.92	BRIC 46	0.722586
BR12-107	Vitrophyre Layer	71.83	0.36	14.68	2.67	0.04	0.88	2.5	4.14	2.59	0.07	0.01	4.8969		166.8	52.9	29.1	34	347.1	317.6	22.9	3.8	10.3	11.8		10.28	70.2	27	5.63	7.5	34.6	784	5.1	2.71	0.84	4.16	5.59	1.02	0.48	15.3	8.93	1.3	0.729	0.474	14.6	10.87	2.49	BRIC 107	0.722104
BR12-79	Vitrophyre Layer	71.79	0.36	14.58	2.72	0.05	0.96	2.65	4.08	2.52	0.07	0.01	5.5356		167.9	49	28.8	37.6	353.8	308.6	20.8	4.3	9.2	15.4		17.8	69.3	27.9	5.23	7.62	35.5	741	4.45	2.5	0.78	5.51	5.78	1.12	0.446	16.17	9.44	1.29	0.775	0.41	15.64	10.72	2.42	BRIC 79	0.721579
BR12-17	Vitrophyre Layer	71.59	0.4	14.61	2.89	0.05	1	2.62	3.9	2.63	0.08	0.02	n.d.		176	51.5	29.7	39.7	345.1	302.2	23	3.3	11.9	11.8		5.59	75.4	30.2	5.6	8.32	36.1	797	4.72	2.64	0.7	5.13	6.25	1.012	0.464	15	10.28	1.22	0.671	0.461	14.75	7.63	2.84	BRIC 17	0.721686
BR12-111	Vitrophyre Layer	71.88	0.36	14.62	2.72	0.04	0.89	2.45	4.19	2.56	0.07	0.01	4.7742		170.1	56.2	28.9	33.9	337.4	265.7	25	3.8	12	17		5.95	72.1	29.7	5.73	7.93	37.3	795	4.52	2.94	0.864	4.79	5.85	1.05	0.446	17.3	9.38	1.26	0.86	0.415	15.9	11.79	3.08	BRIC 111	0.721321
BR12-6	Vitrophyre Layer	72.1	0.35	14.86	2.56	0.04	0.89	2.32	4.51	2.22	0.07	0.02	n.d.		156.2	29.5	34.1	35.8	306.6	223.3	25.9	0.4	0.2	15.8		2.34	72.6	30.7	5.33	7.68	36.4	798	4.68	3.05	0.77	4.76	6.32	1.01	0.416	15.01	9.04	1.17	0.694	0.398	15.15	6.82	2.81	BRIC 6	0.72076
BR12-38	Vitrophyre Layer	71.76	0.37	14.61	2.75	0.04	0.91	2.49	4.14	2.66	0.08	0.01	4.8454		172.9	52.7	29.9	35.7	342.8	246	22.7	1.6	8.1	15.3		4.38	71.1	29.8	5.67	7.59	35.6	803	4.5	2.78	0.81	5.04	5.53	0.94	0.443	15	9.4	1.14	0.83	0.471	15.4	8.51	2.46	BRIC 38	0.720957
BR12-10	Marginal Layer	68.76	0.42	16.52	2.46	0.02	1.03	4.44	2.65	3.27	0.08	0.02	9.0246		192.5	64.3	32.3	35.1	1696	98.6	15.4	7.2	15.1	12.9		1.464	76.3	29	6.19	8.48	39.4	1197	5.36	3.23	0.91	5.46	6.57	1.02	0.453	16.15	9.76	1.37	0.86	0.418	15.93	7.33	3.47
BR12-4	Marginal Layer	67.27	0.44	16.85	2.93	0.05	1.2	5.12	3.56	1.8	0.09	0.02	10.9667		208.8	58.9	34.3	45.2	574.5	116	25.4	2.2	9.7	15.8		6.94	78.5	28.9	6.44	8.52	35.8	705	4.79	3.26	0.96	5.09	6.19	1.021	0.409	15.72	9.96	1.26	0.777	0.48	16.37	7.23	3.19
BR12-7	Marginal Layer	69.09	0.4	16.12	2.7	0.04	1.01	4.04	3.6	2.73	0.08	0.02	8.4377		196.9	56.9	30.5	37.9	430	86.1	25	1.8	8.7	18.8		6.69	74.9	31.6	6.14	8.47	39.3	870	3.85	3.24	0.89	5.13	6.22	1	0.442	15.94	9.59	1.21	0.848	0.451	16.72	7.1	3.02
BR12-78	Marginal Layer	70.37	0.43	14.59	3.31	0.06	1.34	3.35	3.34	2.93	0.09	0.02	5.205		176.1	63.6	28.9	53.1	419.2	216.3	21.1	6.1	14.9	21.9		13.38	68.3	27.4	5.21	7.44	33.8	745	4.82	2.95	0.75	4.63	4.97	0.876	0.434	14.92	11.92	1.03	0.735	0.432	13.7	9.32	2.72
BR12-112	Marginal Layer	66.14	0.43	17.47	3.02	0.04	1.11	3.97	2.82	4.67	0.09	0.02	9.1445		194.4	60.1	36	33.5	1112.1	169.6	24.5	5.6	12.2	14.9		9.75	80.7	32.9	5.82	8.9	39.6	880	5.97	3.33	0.99	5.94	5.79	1.19	0.476	17.59	9.73	1.41	0.925	0.48	17.05	11.24	2.68	BRIC 112	0.717243
BR12-102	Crystalline Layer	72.59	0.33	14.21	2.22	0.05	0.8	2.34	3.38	3.82	0.07	0.01	3.8634		168.7	45.6	27.3	32.7	322.8	145.2	23.3	2.3	8.9	14.6		0.932	68	25	5.12	7.44	34	746	4.62	2.89	0.738	4.77	5.3	0.97	0.414	15.6	8.19	1.07	0.695	0.405	14.3	10.32	2.92
BR12-105	Crystalline Layer	71.72	0.36	14.58	2.52	0.04	0.93	2.22	3.25	4.11	0.07	0.01	3.4144		173.2	49.8	29.7	36.9	297.8	174.8	24.4	4.6	9.6	14.1		1.152	68.9	28.5	5.25	7.68	34.9	735	4.75	2.81	0.846	5.18	4.9	0.973	0.441	15.12	8.36	1.14	0.86	0.42	14.87	11.5	3.18
BR12-108	Crystalline Layer	72.2	0.35	14.13	2.57	0.05	0.89	2.2	3.19	4.15	0.07	0.01	3.5595		168.3	49.6	32.2	31.5	315.3	170.8	21	10.3	6.6	17.5		0.944	72.4	27.6	4.79	7.96	36.7	753	5.15	2.89	0.848	5.62	5.54	1.051	0.391	16.45	8.79	1.2	1.006	0.477	14.66	10.79	3.45	BRIC 108	0.720058
BR12-110	Crystalline Layer	72.21	0.35	14.27	2.37	0.05	0.85	2.24	3.23	4.17	0.07	0.01	3.5459		169.8	46.7	28.1	34.5	301.4	172.1	24.4	2.3	12.2	14.4		0.853	69.1	26.1	5.41	7.43	33.8	742	4.89	2.56	0.789	4.57	5.73	0.937	0.451	14.87	8.53	1.17	0.744	0.4	13.86	10.14	2.35	BRIC 110	0.720248
BR12-12	Crystalline Layer	72.8	0.35	14.21	2.24	0.02	0.85	2.28	2.99	4.1	0.07	0.02	n.d.		157.8	34.8	32.3	37.3	289.7	153.6	22.5	0.8	2.9	14.7		0.642	60.1	25.3	5.21	6.93	30	664	4.27	2.48	0.619	4.21	5.1	0.881	0.39	12.82	8.03	1.06	0.699	0.364	13.36	5.86	2.46
BR12-13	Crystalline Layer	72.72	0.35	13.91	2.46	0.03	0.76	2.24	3.01	4.25	0.07	0.01	3.2501		168.1	48.3	27.1	33.8	303.9	171.3	23.4	4.5	8.3	15		0.923	66.6	24.7	5.22	7.38	34.3	715	4.21	2.57	0.74	4.63	5.52	0.95	0.373	14.35	9.21	1.33	0.76	0.389	14.72	6.54	3.17
BR12-16	Crystalline Layer	72.18	0.38	14.11	2.5	0.04	0.92	2.27	3.17	4.13	0.08	0.02	3.3569		174.1	49.1	29.7	37.6	278	171.9	21.6	2.2	10.7	18.4		1.14	68	29.3	4.84	7.67	35.1	739	4.63	2.61	0.75	4.62	6.2	1.02	0.465	14.18	9.35	1.07	0.709	0.49	13.89	6.66	2.38
BR12-18	Crystalline Layer	71.55	0.38	14.31	2.81	0.05	1.01	2.39	3.13	4.09	0.08	0.02	3.3412		176.3	48.8	29.8	28.9	276.1	171.3	21.6	4.8	8.2	14.7		1.197	74.3	28.5	5.13	7.77	32.7	757	4.93	2.81	0.84	4.4	5.5	0.966	0.535	14.5	9.08	1.17	0.726	0.418	14.81	6.87	3.31	BRIC 18	0.720577
BR12-2	Crystalline Layer	71.52	0.38	14.49	2.66	0.05	0.96	2.25	3.31	4.15	0.08	0.02	7.7809		170	65.5	30.9	35.1	273.1	175.2	23	4.9	8.2	17.1		1.092	67.9	27.4	5.08	7.34	33.3	733	4.56	3.06	0.855	4.41	5.23	1.004	0.465	14.5	9.2	1.27	0.8	0.431	14.13	6.36	2.61
BR12-20	Crystalline Layer	71.68	0.35	14.41	2.51	0.04	0.93	2.3	3.31	4.19	0.07	0.01	4.0678		170.3	51.7	27.8	35.7	289.4	176.2	23.1	3.3	9	17.6		1.076	64.9	26.4	4.88	7.24	34.5	720	4.3	2.84	0.714	4.69	5.18	0.92	0.444	14.06	8.99	1.17	0.809	0.49	14.78	6.67	3.1
BR12-37	Crystalline Layer	71.6	0.36	14.52	2.52	0.03	0.86	2.32	3.33	4.18	0.08	0.01	4.2158		172.2	49	30.3	35.1	304.8	175.9	21.8	7.7	15.2	18.5		0.791	64	26	5.56	6.86	33.2	685	4.31	2.59	0.728	4.66	5.49	0.941	0.411	13.51	8.24	1.16	0.672	0.447	13.69	6.58	2.68	BRIC 37	0.720227
BR12-5	Crystalline Layer	72.1	0.35	14.24	2.39	0.03	0.89	2.1	3.2	4.43	0.07	0.01	3.5928		171.1	47.8	27.9	34.3	276.2	180.3	22.7	4.7	9.4	10.8		0.835	65.3	25.2	4.95	7.28	33.7	680	4.04	2.82	0.793	4.55	5.02	0.969	0.389	14.5	8.12	1.1	0.797	0.362	14.13	5.68	3.19	BRIC 5	0.7208
BR12-63A	Crystalline Layer	71.75	0.36	14.47	2.47	0.04	1.14	2.1	3.14	4.26	0.07	0.01	4.8636		175.1	48.5	28.8	33.2	283.5	176.8	24.3	1.7	11.4	13.5		1.416	66.7	26.5	5.39	7.14	34.6	766	4.37	2.68	0.758	4.82	5.22	0.928	0.411	14.47	8.63	1.12	0.772	0.393	14.57	8.79	3.06
BR12-8	Crystalline Layer	72.14	0.36	14.16	2.53	0.04	0.86	2.19	3.31	4.13	0.07	0.01	3.2534		172.4	53.1	28.3	35.7	294.6	171.9	22.1	2.8	9.3	16		1.121	66.4	26.7	5.6	7.53	32.6	746	4.72	2.55	0.709	4.44	4.95	0.873	0.413	13.72	8.62	1.15	0.698	0.435	14.3	6.52	3.02
BR12-82	Crystalline Layer	72.42	0.33	14.07	2.39	0.04	0.83	2.06	3.28	4.3	0.07	0.01	1.5016		165	48.2	28.8	31.5	291.5	176.3	23.2	4.3	8.3	16.4		1.087	66.5	26.3	4.68	7.82	33.5	705	4.97	2.32	0.67	4.54	5.05	0.931	0.378	15.5	8.4	1.13	0.76	0.368	14.2	9.68	3.09	BRIC 82	0.720588
BR12-118A	Vitrophyre Pod	69.09	0.49	14.49	4.07	0.06	1.52	3.27	3.13	3.57	0.1	0.02	4.7703		184.7	61	30.4	65.9	296.3	153.7	20.2	5.7	16.3	20.7		1.398	71.4	29.8	4.96	7.72	34.9	700	5.32	2.85	0.881	5.4	5.55	0.994	0.43	13.93	13.91	1.187	0.836	0.461	13.85	8.23	2.86
BR12-121	Vitrophyre Pod	69.16	0.49	14.5	3.95	0.07	1.54	3.32	3.2	3.49	0.1	0.02	4.5842		184.4	58.3	31	65.1	299.4	151.9	21.5	8.1	23.6	21		1.425	71	28.2	5.39	7.92	35.2	731	5.39	3.06	0.91	5.2	5.43	1.04	0.486	14.2	14.24	1.112	0.789	0.424	13.97	8.57	3.14
BR12-122	Vitrophyre Pod	69.04	0.48	14.47	4.01	0.07	1.58	3.3	3.05	3.71	0.1	0.02	4.0585		182	58.8	30.2	66.5	296.6	171.8	20.8	7.1	20.4	19		1.34	66.7	27.3	5.18	7.4	32.8	641	4.7	2.89	0.895	5.27	5.21	0.917	0.411	13.6	13.49	1.002	0.791	0.427	12.8	8.21	3.09
BR12-123	Vitrophyre Pod	69.08	0.49	14.46	4.02	0.07	1.57	3.32	3.2	3.48	0.1	0.02	4.1264		184.1	60.8	30.3	67.7	298.1	153.4	17.8	8	19	21.3		1.476	75.5	29.1	5.44	8.02	35.1	710	4.75	2.39	0.994	4.67	5.36	0.978	0.431	14.76	14.3	1.11	0.747	0.395	13.26	9.16	2.86
BR12-120	Vitrophyre Pod	68.9	0.49	14.41	4.15	0.06	1.53	3.26	3.06	3.85	0.1	0.02	5.3489		184.3	58.9	30.2	65.8	296.1	180.3	21.7	6.8	17.9	19		1.62	69.5	28.6	5.42	7.98	34.2	685	4.79	2.99	0.95	5.08	5.71	0.906	0.45	13.66	13.56	1.013	0.782	0.434	13.43	8.44	2.8	BRIC 120	0.720724
BR12-119	Vitrophyre Pod	69.1	0.49	14.46	4	0.07	1.56	3.3	3.27	3.46	0.1	0.02	5.0055		184.5	62.2	30.8	64.6	303.1	166.9	22.4	9.6	15.5	21.3		1.726	71.1	28.3	5.52	8.09	35	704	5.03	2.8	0.882	5.19	5.42	1.025	0.479	14.86	14.61	1.084	0.814	0.45	13.64	9.51	3.19	BRIC 119	0.720133
BR12-124	Vitrophyre Pod	67.52	0.53	14.65	4.73	0.08	2.02	4.38	3.36	2.44	0.1	0.02	5.4973		173.5	68.8	31.3	92.1	290	186.1	19	13.6	25.4	24.1		2.45	65.4	27.6	5.2	7.27	30.5	566	4.71	2.69	0.93	4.67	4.96	0.958	0.4	12.77	17.48	1.024	0.729	0.42	11.58	7.77	2.77
B-78-14	Brown Hills Plutonics	66.0713	0.670317	15.7374	5.80275	0.100047	1.32062	4.69222	3.56169	1.73082	0.150071				300.1	69	23	46	301.1	70	8	3	25	10		4.7	34.02	15	4.02	4.4	17.06	306.8	3.91	2.39	1.566	4.42	7.45	0.826	0.337	16.82	17.96	1.349	0.642	0.35	3.52	1.282	2.33		0.71626
B-78-33	Brown Hills Plutonics	69.118	0.4937	15.7293	3.67313	0.069118	0.947904	4.04834	3.26829	2.26115	0.108614				242.9	79	16.8	37.5	258.7	71.1	16.8	3	21.7	8.9		4.29	65.99	26	3.66	6.83	31.5	309.8	2.18	1.401	1.78	2.61	7.73	0.444	0.233	16.54	12.8	1.384	0.369	0.208	5.33	1.886	1.49		0.717282
B-78-9	Brown Hills Plutonics	66.8619	0.732541	15.9955	5.51915	0.100348	1.16404	4.7866	2.9703	1.54536	0.140487				364.3	51.2	16.1	37.1	305.1	56.2	14	3	29.1	12		3.152	153.7	46	7.23	15.52	78.4	1570	3.97	2.04	1.875	5.25	7.36	0.728	0.304	12.48	14.35	0.851	0.681	0.336	8.52	1.433	2.12		0.716848
OU 65800	Brown Hills Plutonics	76.62	0.03	12.85	0.73	0.04	0.01	0.96	3.55	4.6	0.01				67	24	40	2	21	172	36	3	5	1			21	12			6	92								17	2				13	3
OU 65801	Brown Hills Plutonics	74.56	0.19	12.59	2.88	0.07	0.07	1.68	3.5	3.6	0.02				228	89	49	2	120	152	22	3	4	1			88	44	8.24		44	573			1.36			1.85	0.75	14	7		1.27		14	4	5.21		0.738746
OU 65802	Brown Hills Plutonics	74.65	0.26	12.64	2.71	0.05	0.16	1.14	3.32	4.32	0.04				307	83	84	8	56	193	25	4	4	5			114	59	11		54	742			1.28			3.02	1.05	21	2		2.22		13	3	7.86
OU 65803	Brown Hills Plutonics	77.49	0.1	12.15	0.69	0.01	0.02	0.6	2.68	5.7	0.01				86	27	20	3	29	213	30	2	7	4			73	30			24	112								5	2				32	4
OU 65804	Brown Hills Plutonics	75.03	0.19	12.8	1.78	0.03	0.17	1.31	3.09	4.66	0.03				147	57	42	9	80	177	26	3	5	2			101	48			45	573								10	6				15	2
OU 65805	Brown Hills Plutonics	77.22	0.16	11.43	1.57	0.03	0.09	0.59	2.35	5.62	0.02				193	52	42	4	36	179	22	4	4	6			226	97			111	384								10	3				26	2
OU 65811	Brown Hills Plutonics	67.08	0.44	16.18	3.31	0.06	1.43	4.07	3.56	2.74	0.12				111	59	9	37	545	86	14	6	3	10			32	17			19	643								6	5				7	bd
OU 65812	Brown Hills Plutonics	65.23	0.6	17.32	3.23	0.05	1.41	4.88	3.95	2.37	0.16				141	61	17	35	775	79	13	5	4	8			41	16			19	801								8	5				8	1
OU 65813	Brown Hills Plutonics	65.21	0.62	17.24	3.48	0.05	1.55	4.87	3.85	2.19	0.15				152	68	15	37	755	76	11	5	6	8			42	15			20	516								6	8				7	1
OU 65815	Brown Hills Plutonics	70.88	0.39	14.49	3.63	0.06	0.65	3.02	3.07	3.09	0.08				173	69	25	24	189	115	17	4	5	8			135	53			63	610								11	10				11	3
OU 65816	Brown Hills Plutonics	72.22	0.17	14.13	1.98	0.05	0.36	1.94	2.42	5.9	0.06				102	40	22	5	208	145	25	2	7	6			84	40			43	973								7	8				19	3
OU 65818	Brown Hills Plutonics	71.44	0.42	13.94	3.57	0.06	0.7	3.01	2.86	3.27	0.08				198	54	31	25	160	117	18	4	8	7			104	40	6.99		52	730			1.07			1.16	0.4	10	9		0.86		14	2	2.86		0.723771
OU 65819	Brown Hills Plutonics	72.58	0.27	13.64	2.75	0.04	0.33	3.01	2.67	3.3	0.06				196	49	27	13	214	110	19	3	6	3			101	46	6.73		55	985			1.27			1.11	0.37	9	8		0.9		9	1	2.58		0.728436
OU 65820	Brown Hills Plutonics	72.86	0.27	13.86	2.23	0.04	0.44	2.44	2.99	3.64	0.05				140	42	32	16	177	126	23	4	5	6			94	38			46	519								10	6				14	3
OU 65821	Brown Hills Plutonics	74.8	0.16	12.94	1.81	0.04	0.23	1.53	2.85	4.48	0.03				129	53	28	10	132	185	25	3	5	4			94	42			41	373								12	1				10	2
OU 65822	Brown Hills Plutonics	74.55	0.22	12.96	2.06	0.04	0.32	1.64	2.6	4.88	0.04				131	44	45	11	88	190	26	3	5	4			92	45			41	440								11	7				22	4
OU 65823	Brown Hills Plutonics	70.6	0.25	15.27	2.51	0.05	0.59	3.21	3.75	2.71	0.07				115	48	20	14	344	102	18	3	5	2			41	15	3.53		27	787			0.91			0.68	0.22	6	4		0.53		7	3	1.59
OU 65824	Brown Hills Plutonics	75.78	0.13	12.63	1.24	0.03	0.17	1.34	2.82	4.73	0.02				99	30	38	7	65	201	27	3	6	3			68	34	6.42		28	286			0.41			1.21	0.35	8	2		0.96		25	2	2.75
OU 65825	Brown Hills Plutonics	75.64	0.06	13.61	0.61	0.02	0.07	1.58	3.72	3.78	0.01				41	21	13	3	88	144	26	2	5	3			26	11			10	157								7	1				7	3
OU 65827	Brown Hills Plutonics	75.18	0.02	13.91	0.52	0.04	0.06	1.27	3.67	4.61	0.01				70	31	26	2	69	217	44	2	5	4			15	9			6	79								14	3				4	5
OU 65828a	Brown Hills Plutonics	74.23	0.09	14.31	1.33	0.03	0.14	1.94	3.91	2.96	0.02				76	53	19	5	248	99	19	3	7	3			102	36			48	574								9	2				4	5
OU 65828b	Brown Hills Plutonics	77.02	0.1	12.27	1.38	0.02	0.07	1.06	2.29	5.27	0.01				193	53	11	4	145	148	23	2	4	2			19	11			13	764								7	3				29	4
OU 65828c	Brown Hills Plutonics	75.13	0.04	13.83	0.53	0.04	0.03	1.23	3.1	5.28	0.01				53	30	26	2	145	142	24	3	4	3			18	8			15	687								7	3				12	5
OU 65828d	Brown Hills Plutonics	76.52	0.1	12.3	1.25	0.02	0.07	1.04	2.25	5.63	0.01				185	56	20	2	104	154	23	3	8	4			112	55			48	664								10	1				14	5
OU 65828e	Brown Hills Plutonics	76.87	0.1	12.38	1.24	0.02	0.04	1.04	2.22	5.66	0.01				174	53	68	1	90	155	24	4	4	6			322	162			128	678								10	3				17	3
OU 65829	Brown Hills Plutonics	75.25	0.05	13.59	0.69	0.03	0.09	1.26	3.53	4.56	0.01				92	37	32	4	88	188	36	2	4	5			14	9			11	276								12	1				8	4
OU 65830	Brown Hills Plutonics	74.49	0.04	13.74	0.49	0.05	0.04	1.4	3.24	4.89	0.01				75	15	34	2	58	191	45	3	9	6			5	7			3	102								11	2				2	4
OU 65831	Brown Hills Plutonics	74.41	0.09	14.03	0.91	0.04	0.15	1.43	3.5	4.57	0.02				89	30	20	1	168	190	35	2	5	4			36	17			17	577								12	1				8	3
OU 65832	Brown Hills Plutonics	75.64	0.05	12.34	0.79	0.03	0.06	0.82	2.37	6.12	0.01				72	20	32	2	53	235	34	3	4	2			57	32			20	109								6	2				25	3
OU 65833	Brown Hills Plutonics	74.98	0.04	13.87	0.79	0.04	0.06	1.25	4.04	4.33	0.01				41	32	60	2	59	180	36	4	5	5			2	7			5	169								11	4				9	5
OU65810	Brown Hills Plutonics	65.76	0.59	17.11	3.22	0.05	1.44	4.76	3.91	2.28	0.14				139	83	17	35	715	88	13	6	4	8			50	18			23	526								7	7				11	1
OU65817	Brown Hills Plutonics	69.56	0.45	14.33	4.19	0.07	0.89	3.31	2.85	3.43	0.09				179	60	39	34	163	113	19	4	7	13			100	42			52	705								12	12				14	3
[truncated: 9 more columns]
